# Supplementary material for: Enzyme immobilised novel core–shell superparamagnetic nanocomposites for enantioselective formation of 4-(R)-hydroxycyclopent-2-en-1-(S)-acetate
Source: Royal Society of Chemistry journal article supplement (doi:10.1039/c4cc05358c), 2014-01-01
Supplement: c4cc05358c1.pdf [file c4cc05358c1.pdf]

# Electronic Supplementary information

## Enantioselective formation of 4-(*R*)-hydroxycyclopent-2-en-1-(*S*)-acetate by chiral catalysis using enzymes immobilized magnetic core-shell nanocomposites

Maneea Eizadi-sharifabad<sup>a,b</sup>, Ben Hodgson<sup>a,b</sup>, Mourad Jellite<sup>a,b</sup>, Tim Mercer<sup>a,c</sup>, Tapas Sen<sup>a,b\*</sup>

<sup>a</sup>Centre for Materials Science, School of Forensic and Investigative Sciences, University of Central Lancashire, Preston, PR1 2HE, United Kingdom

<sup>b</sup>Surface Patterning Group, Institute of Nanotechnology and Bioengineering, University of Central Lancashire, Preston, PR1 2HE, United Kingdom

<sup>c</sup>School of Computing and Physical Sciences, University of Central Lancashire, Preston, PR1 2HE, United Kingdom

**\*Corresponding Author**

Telephone number: +44(0)1772894371

Email address: [tsen@uclan.ac.uk](mailto:tsen@uclan.ac.uk)

## Experimental

*Synthesis of monodisperse ultra small magnetite nanoparticles:* Synthesis of magnetite ( $\text{Fe}_3\text{O}_4$ ) nanoparticles (MNP), with narrow particle size distribution was performed according to procedures previously reported by our group<sup>1</sup>. 8.46 g  $\text{FeCl}_2 \cdot 4\text{H}_2\text{O}$  and 22.95 g of  $\text{FeCl}_3 \cdot 6\text{H}_2\text{O}$  were dissolved in 500 ml deionised water previously degassed with nitrogen. The mixture kept at  $80^\circ\text{C}$  under nitrogen atmosphere and 50 mL of aqueous ammonium hydroxide (25% w/v  $\text{NH}_4\text{OH}$ ) was added drop wise to the mixture over 30 min under vigorous stirring. The reaction was allowed to proceed for a further 1 hour. The black reaction products were collected and washed several times in deionised water using magnetic separation. The obtained MNPs were then coated with mesoporous silica shell as described in the following section.

*Synthesis of core-shell magnetic nanoparticles:* 480 mg of magnetite nanoparticles was dispersed in 200 ml of an ethanol/water (4/1, V/V) solution. 14 ml of 28%  $\text{NH}_4\text{OH}$  solution was added to the mixture and stirred for 5 minutes. Afterward 10 g of cetyl trimethyl ammonium bromide (CTAB) was added to the solution and the suspension was homogenized by ultrasonic bath for 15 min. 6 mL of tetraethoxy silane (TEOS) was then added drop-wise under vigorous stirring for 24hrs. The resultant black product was isolated from the reaction mixture and washed several times with acidic ethanol solution in ultrasonic bath to remove the surfactant from the mesopores, followed by subsequent washing with deionised.

*Surface functionalization:* Surface activation of nanoparticles was performed using the novel tri-phasic reverse emulsion method (TPRE) reported recently by our group<sup>2</sup>, 150 mg of mesoporous silica coated nanoparticles were dispersed in 30ml of toluene in the presence of 5g of Triton X100 and the mixture was shaken to form a tri-phasic reverse emulsion. APTS was added to the emulsion to a final concentration of 2% w/v and the mixture kept on a rotator at 40 rpm for 24 hours at  $50^\circ\text{C}$ . After 24 hours of reaction, the nanoparticles were collected by magnetic separation and washed 3 times with coupling solution [0.8 % (v/v) glacial acetic acid in methanol]. The surface amine density was measured by an established colorimetric assay<sup>3,4</sup> using 4-nitrobenzaldehyde.

*Conversion of surface amine groups to aldehyde:* This reaction was performed by using glutaraldehyde. SSC buffer (20 $\times$ ) was prepared by dissolving sodium chloride (175.3 g) and sodium citrate (88.2 g) in 1 litre distilled, deionised water (final pH 7.4). SSC buffer (1 $\times$ ) was prepared by diluting 50 mL 20 $\times$ SSC buffer to 1 litre with distilled, deionised water. 50 mg of nanoparticles were washed 3 times with 10 mL 1 $\times$ SSC buffer and the supernatant removed. 4 mL of a 5% w/v glutaraldehyde solution (in 20 $\times$ SSC buffer) was added and the suspension was incubated for 3 hours at  $18^\circ\text{C}$  with end-over-end rotation (40 rpm). After 3 hours, the nanoparticles were collected magnetically, washed 3 times with 5 mL 1 $\times$ SSC buffer followed by 3 times with 5 mL of PBS buffer.

*Immobilisation of lipases on nanoparticles:* 50 mg of the nanoparticles (non-functionalised for physical absorption or functionalised for covalent binding with enzyme) were added to 4 ml of lipase solution (1mg/ml lipase in phosphate buffer). The mixture was incubated at 18°C with constant rotation at 40 rpm for 20 h. After incubation, the enzyme adsorbed nanoparticles were separated and the amount of enzyme immobilised was calculated by determining the amount of lipase left in the supernatant by measuring absorption at  $\lambda_{595\text{nm}}$  using UV/Vis spectrophotometry by Bradford assay<sup>5</sup>.

**Table S1:** Concentration of enzymes loaded onto the nanoparticles by different routes

| Modified nanoparticles     | $\mu\text{g}$ of enzyme loaded / mg of nanoparticles | Amount (mg) of modified nanoparticles used (equivalent to 500 $\mu\text{g}$ enzyme) |
|----------------------------|------------------------------------------------------|-------------------------------------------------------------------------------------|
| Chemically immobilised CRL | 80.0                                                 | 6.3                                                                                 |
| Physically immobilised CRL | 72.0                                                 | 6.9                                                                                 |
| Chemically immobilised PFL | 44.0                                                 | 11.4                                                                                |
| Physically immobilised PFL | 76.1                                                 | 6.6                                                                                 |

*Desymmetrization of meso-cyclopent-2-en-1,4-diacetate by enzymatic hydrolysis:* 50 $\mu\text{mol}$  of cyclopent-2-en-1,4-diacetate was added to 1mL of solvent mixture (hexane: water ratio is 80% to 20%) followed by the addition of 500  $\mu\text{g}$  of free lipases or equivalent amount of immobilised lipase on nanoparticles support (see table S1). The reaction mixture was incubated at 25°C with end-over-end rotation (40 rpm). During the reaction, a 5  $\mu\text{L}$  aliquot of the reaction mixture (water layer) was withdrawn at different time intervals (1 h, 4 h, 24 h and 48 h) and analyzed by GC for the determination of products such as meso-cyclopent-2-en-1,4-diol, 4-(*R*)-hydroxycyclopent-2-en-1-(*S*)-acetate and its enantiomer 4-(*S*)-hydroxycyclopent-2-en-1-(*R*)-acetate as they are soluble in water. The hexane layer was analysed for the determination of concentration of un-reacted meso-cyclopent-2-en-1,4-diacetate.

#### **Characterization:**

Small Angle X-ray Scattering (SAXS) measurements of the mesoporous core-shell nanoparticles were performed by using HECUS S3 Micro, GMBH GRAZ with Geni Xenocs software instrument in order to investigate the size and shape of the particles. Scattering curves were monitored in a  $q$ -range from 0.01 to 0.5  $\text{\AA}^{-1}$ . A broad peak corresponding to the mesopores size of 3.9 nm (see Figure S2)

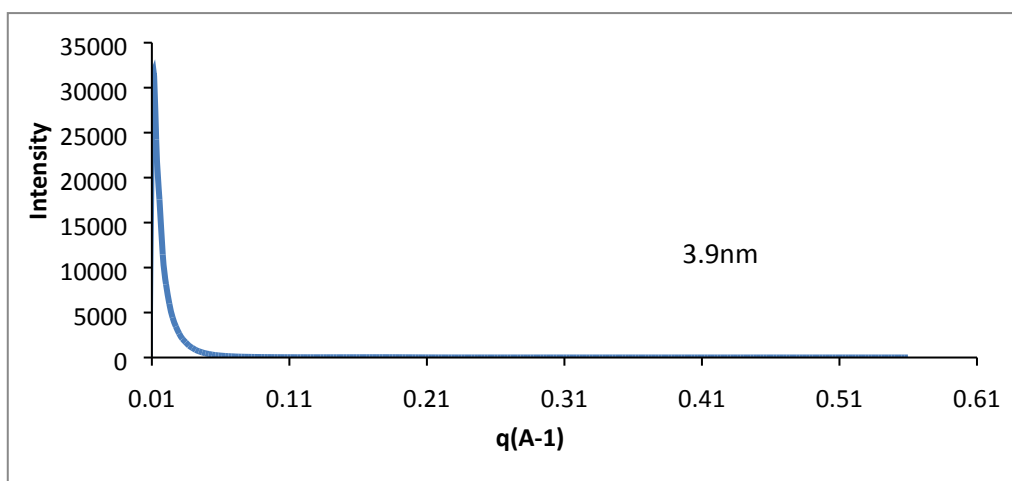

**Figure S1:** SAXS pattern of mesoporous silica core shell particles.

The powder X-ray diffraction pattern of the iron oxide core nanoparticles was performed using Inel Equinox 2000 powder diffractometer equipment. The samples preparation was done by drying and grinding of nanocomposites into a fine powder. The powder was packed into X-ray sample holder ensuring smooth surface with no visible pits or cracks.

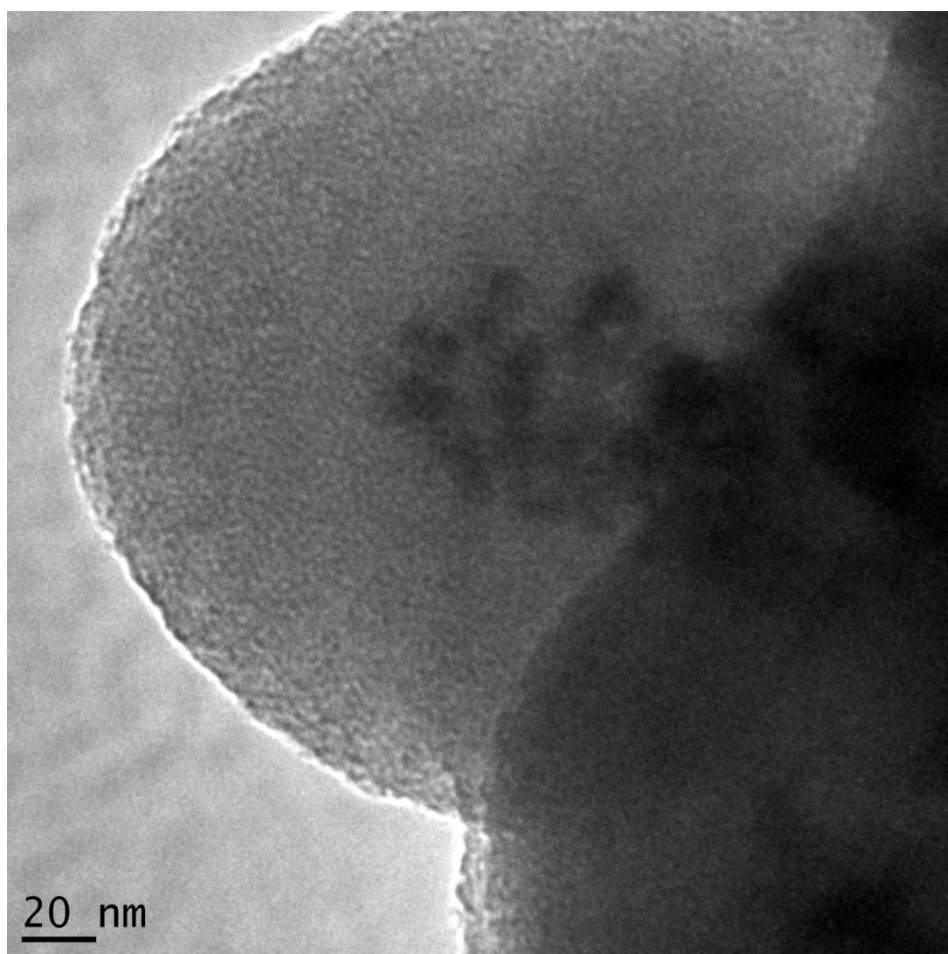

**Figure S2:** TEM image of core-shell nanocomposites

The materials exhibited various peaks (Figure S1) corresponding to Miller indices of 220, 311, 400, 422, 511, 440. They have been identified as fingerprint peaks of pure magnetite ( $\text{Fe}_3\text{O}_4$ ) in the  $2\theta$  range of 30 to 75. The low intensity of the peaks is an indication of ultra-small size of magnetite particles. The mean particle diameters were also calculated from the XRD pattern using the line width of most intense peak corresponding to 311 Miller plane by applying the Scherer equation:

$D = k\lambda / (b \times \cos\theta)$  where  $b$  is the peak width of the XRD peak at angle  $\theta$ ,  $\lambda$  is the wavelength (1.5418 Å) of the X-ray used, and  $K$  is the Scherer constant (a shape factor), about 0.9 for magnetite and maghemite<sup>6</sup>. The mean particles sizes were calculated to be 10.4 nm which is similar to the value obtained from the TEM analysis reported in the manuscript.

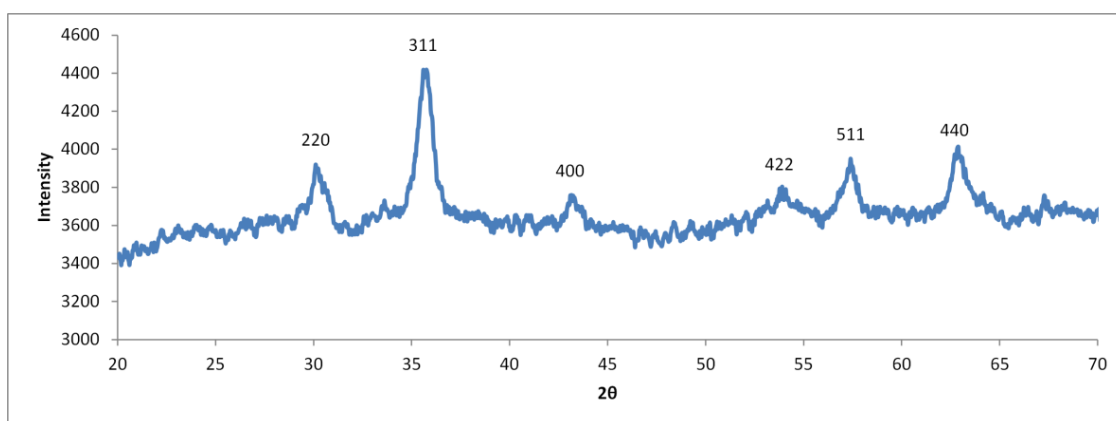

**Figure S3:** XRD pattern of core magnetite

Transmission electron microscopy (TEM), analysis was conducted on a JEOL JEM-2000 EX electron microscope Operated at 200 kV. Images were processed using Gatan Digital Micrograph Software.

$\text{N}_2$  gas adsorption and desorption isotherms were collected using a Micromeritics ASAP 2010 (Accelerated Surface Area and Porosimetry System) instrument. Brunauer-Emmett-Teller method (BET) was used to calculate the specific surface area of the materials and BJH method was used for average pore size determination.

## Sample analysis

*Gas Chromatography (GC) and Gas Chromatography-Mass Spectrometry (GC-MS) for the detection of chiral products*

Starting material meso-cyclopent-2-en-1,4-diacetate and products such as meso-cyclopent-2-en-1,4-diol, 4-(*R*)-hydroxycyclopent-2-en-1-(*S*)-acetate and its enantiomer 4-(*S*)-hydroxycyclopent-2-en-1-(*R*)-acetate were quantitatively determined using a Varian Chrompack CP-3380 Gas Chromatograph and nitrogen as the carrier gas (California, USA). Chromatograms were interpreted using Varian Star Integrator software version 4.51. The method of analysis involved injecting 1  $\mu$ L of aliquot (the water layer) of the reaction mixture and analysed with a temperature program starting at 50°C and finishes at 200°C with a ramp rate of 10°C per minute.

Selected reaction products were also analysed (where specified) by GC-MS on a ThermoScientific Trace GC ultra (Milan, Italy), with DSQ II Mass Spectrometer (Texas, USA) and a Triplus AS auto-sampler, using helium as the carrier gas. Chromatograms were interpreted using Xcalibur software version 2.0.7.

Both techniques employed a Supelco BETA DEX™ 110 fused silica capillary column (length = 30 m, internal diameter = 0.25 mm, film thickness 0.25  $\mu$ m), which is specifically produced to separate chiral compounds for analysis.

Calibration curves were constructed using a series of dilutions of meso-cyclopent-2-en-1,4-diacetate, meso-cyclopent-2-en-1,4-diol, 4-(*R*)-hydroxycyclopent-2-en-1-(*S*)-acetate and its enantiomer 4-(*S*)-hydroxycyclopent-2-en-1-(*R*)-acetate.

Calibration curves were constructed in water for 4-(*R*)-hydroxycyclopent-2-en-1-(*S*)-acetate and meso-cyclopent-2-en-1,4-diol, as they both are insoluble in hexane. A calibration curve for meso-cyclopent-2-en-1,4-diacetate was constructed in hexane to calculate the exact amount of starting material at time = 0 minutes and to monitor the conversion. In the case of the compounds calibrated in water, the data (absolute peak areas) were plotted against various known concentrations.

The calibration curves constructed for 4-(*R*)-hydroxycyclopent-2-en-1-(*S*)-acetate and meso-cyclopent-2-en-1,4-diol are presented in Figure S3. The regression values ( $R=0.99$ ) of both the linear plots are within the high confidence range.

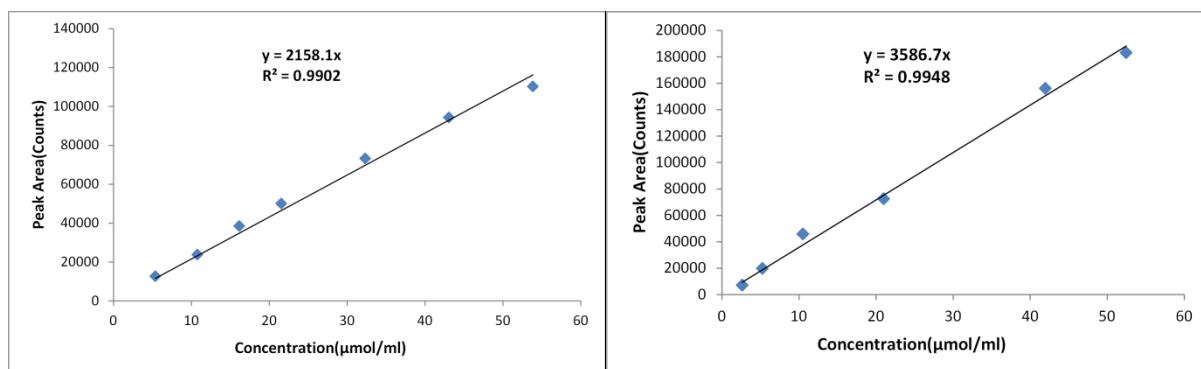

**Figure S4:** Calibration curves for meso-cyclopent-2-en-1,4-diol(left) and 4-(R)-hydroxycyclopent-2-en-1-(S)-acetate (right) in water.

Figure S4 present the calibration curve of meso-cyclopent-2-en-1,4-diacetate in hexane. The regression value ( $R=0.99$ ) of the linear plot is within the high confidence range hence used for the determination of unknown concentration in the hexane layer during the experiment.

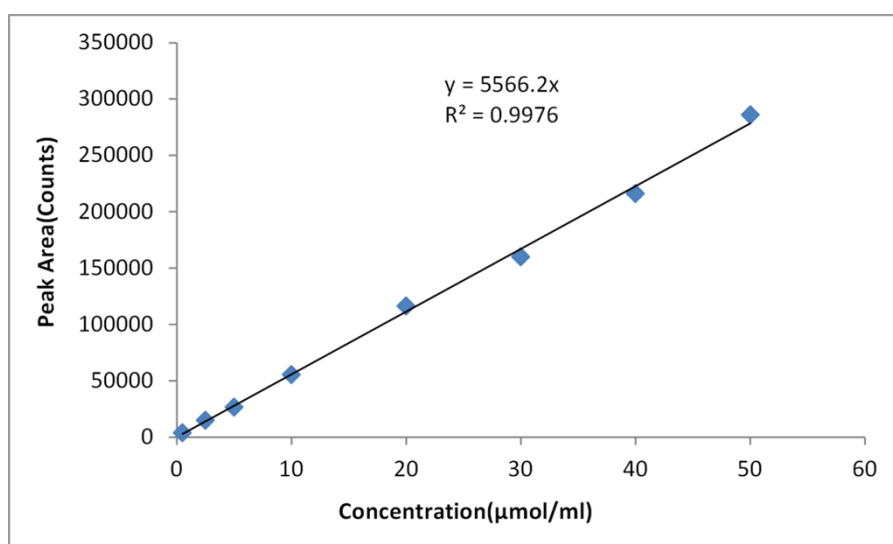

**Figure S5:** Calibration curve for meso-cyclopent-2-en-1,4-diacetate in hexane.

Figures S5 and S6 present the gas chromatographs of reaction products using two different enzymes. Figure S5 exhibited one optical isomer (retention time  $R_T = 11.15$ mins) when PFL was used as an enzyme whereas Figure S6 exhibited both isomers at two different retention times ( $R_T = 11.15$ mins and  $R_T = 11.27$ mins). The confirmation of the chiral products due to the retention times of 11.15 mins and 11.27 mins were verified by injecting pure commercial (Sigma Aldrich: Cat. No.446041 and Cat. No. 00848) compounds corresponding to the two chiral isomers.

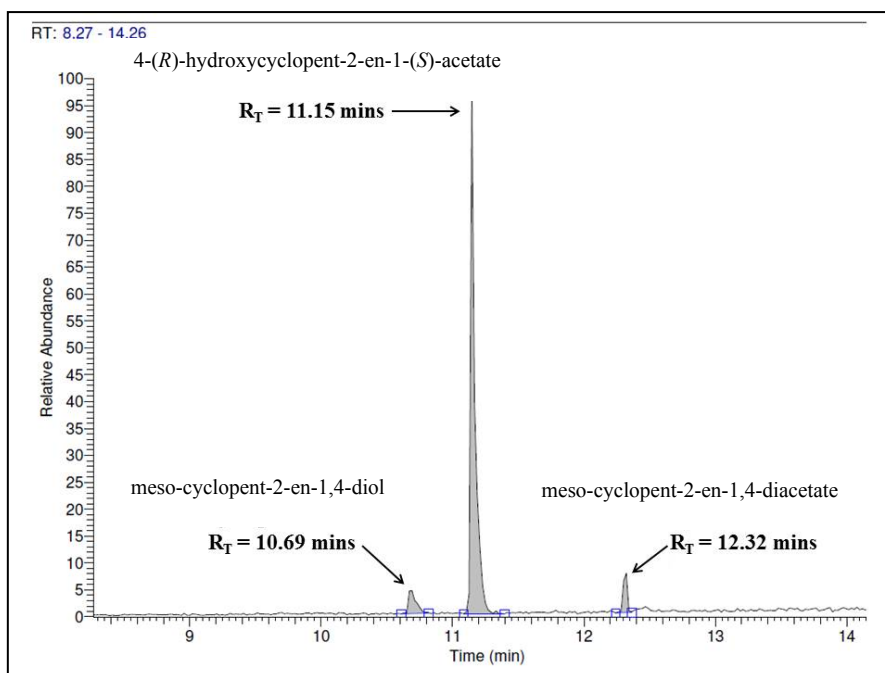

**Figure S6:** Scanned GC chromatogram of the reaction products after 48 hours using PFL immobilised nanoparticles. Retention time is indicated by  $R_T$ .

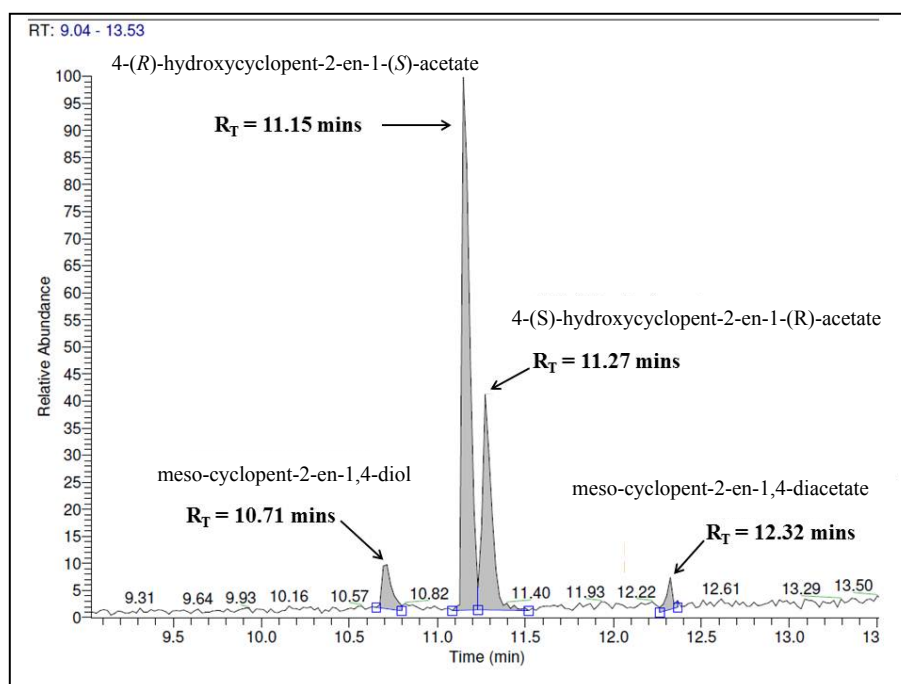

**Figure S7:** Scanned GC chromatogram of the reaction products after 48 hours using immobilised CRL as catalyst. Retention time is indicated by  $R_T$ .

The products were further confirmed by injecting them in GC-MS. It was found that the compound corresponding to the peak at  $R_T = 11.27$  mins was found to have the same mass as 4-(*R*)-hydroxycyclopent-2-en-1-(*S*)-acetate obtained from the compound at  $R_T = 11.15$ .



We have further confirmed that the peak at  $R_T = 11.15$  was due to the chiral product (1*S*,4*R*)-form by adding a small amount ( $\sim 5 \mu\text{mol}$ ) of pure 4-(*R*)-hydroxycyclopent-2-en-1-(*S*)-acetate (Sigma-Aldrich Cat. No.446041) into the reaction mixture. It was observed that only the peak area corresponding to the peak at  $R_T$  11.15 mins (i.e. 4-(*R*)-hydroxycyclopent-2-en-1-(*S*)-acetate) had increase. Similarly, when a small amount ( $\sim 5 \mu\text{mol}$ ) of pure 4-(*S*)-hydroxycyclopent-2-en-1-(*R*)-acetate (Sigma-Aldrich cat. No. 00848) was added to the mixture and it was observed that only the peak area corresponding to  $R_T = 11.27$  mins (i.e. 4-(*S*)-hydroxycyclopent-2-en-1-(*R*)-acetate) had increase. Hence, it was concluded from this and the GC-MS data, that the peak at 11.27 mins correspond to 4-(*S*)-hydroxycyclopent-2-en-1-(*R*)-acetate.

The enantiomeric excess (*e.e.*) in the reaction mixture was calculated using the following equation reported earlier.<sup>7</sup>

$$e.e. = \frac{\text{moles of major enantiomer} - \text{moles of minor enantiomer}}{\text{total moles of both enantiomers}}$$

**Table S2:** Enantiomeric excess of 4-(*R*)-hydroxycyclopent-2-en-1-(*S*)-acetate at different reaction times using PFL and CRL immobilized nanoparticles

| Time (hr) | Enzyme PFL          |                        | Enzyme CRL          |                        |
|-----------|---------------------|------------------------|---------------------|------------------------|
|           | Physically adsorbed | Chemically immobilized | Physically adsorbed | Chemically immobilized |
| 1         | 1                   | 1                      | 0.29                | 0.44                   |
| 4         | 1                   | 1                      | 0.43                | 0.45                   |
| 24        | 1                   | 1                      | 0.51                | 0.45                   |
| 48        | 1                   | 1                      | 0.56                | 0.43                   |

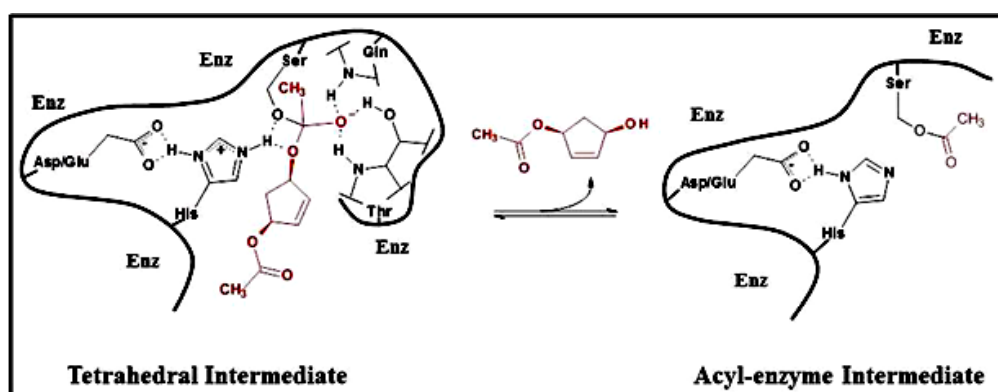

**Reaction Scheme S1:** Plausible reaction mechanism with active site of the enzyme<sup>8</sup>

Sample: MANEE ME50 SAMPLE2  
 Operator:  
 Submitter:  
 File Name: C:\ASAP2010\DATA\000-330.SMP

Started: 12/3/13 1:19:11PM Analysis Adsorptive: N2  
 Completed: 12/3/13 7:52:54PM Analysis Bath: 77.35 K  
 Report Time: 12/4/13 12:22:19PM Thermal Correction: No  
 Sample Weight: 0.0390 g Smoothed Pressures: No  
 Warm Freespace: 26.9656 cm<sup>3</sup> Cold Freespace: 84.3376 cm<sup>3</sup>  
 MEASURED  
 Equil. Interval: 5 secs Low Pressure Dose: None

---

### Analysis Log

| Relative Pressure | Pressure (mmHg) | Vol Adsorbed (cm <sup>3</sup> /g STP) | Elapsed Time (HR:MN) | Saturation Press.(mmHg) |
|-------------------|-----------------|---------------------------------------|----------------------|-------------------------|
|                   |                 | 01:08                                 | 778.82013            |                         |
| 0.009696153       | 7.55225         | 165.5964                              | 01:35                |                         |
| 0.029195433       | 22.74092        | 202.6007                              | 01:46                |                         |
| 0.059476162       | 46.32861        | 232.8964                              | 01:55                |                         |
| 0.077457418       | 60.33664        | 246.6897                              | 02:03                |                         |
| 0.099711744       | 77.67383        | 261.8477                              | 02:10                |                         |
| 0.119702483       | 93.24818        | 274.4307                              | 02:16                |                         |
| 0.139577189       | 108.73241       | 286.4065                              | 02:21                |                         |
| 0.159561731       | 124.30315       | 297.9986                              | 02:27                |                         |
| 0.179540750       | 139.86975       | 309.4835                              | 02:32                |                         |
| 0.199643700       | 155.53395       | 320.5264                              | 02:38                |                         |
| 0.247472692       | 192.80006       | 346.0134                              | 02:45                |                         |
| 0.300827520       | 234.37230       | 373.3956                              | 02:51                |                         |
| 0.352159091       | 274.37082       | 399.4691                              | 02:58                |                         |
| 0.399662336       | 311.38742       | 424.2953                              | 03:04                |                         |
| 0.449577198       | 350.28571       | 452.3903                              | 03:11                |                         |
|                   |                 | 03:14                                 | 779.15265            |                         |
| 0.499741916       | 389.37347       | 483.0664                              | 03:20                |                         |
| 0.549579949       | 428.20215       | 517.9254                              | 03:28                |                         |
| 0.600044963       | 467.51886       | 557.8402                              | 03:36                |                         |
| 0.650307459       | 506.67731       | 601.3031                              | 03:44                |                         |
| 0.701402663       | 546.48407       | 643.7252                              | 03:52                |                         |
| 0.751994810       | 585.89929       | 676.1357                              | 03:58                |                         |
| 0.800739853       | 623.87598       | 695.2524                              | 04:02                |                         |
| 0.835924809       | 651.28845       | 703.6163                              | 04:04                |                         |
| 0.866627741       | 675.20880       | 709.4619                              | 04:06                |                         |
| 0.873879904       | 680.85809       | 713.6445                              | 04:08                |                         |
| 0.901661739       | 702.50244       | 717.1811                              | 04:10                |                         |
| 0.941826348       | 733.79437       | 722.1762                              | 04:12                |                         |
| 0.949141171       | 739.49237       | 726.2590                              | 04:14                |                         |
| 0.975940405       | 760.37097       | 730.7147                              | 04:16                |                         |
| 0.994910056       | 775.14819       | 741.8629                              | 04:20                |                         |
| 0.995045885       | 775.24817       | 750.1886                              | 04:30                |                         |
| 0.973327725       | 758.32623       | 745.6572                              | 04:32                |                         |
| 0.933994744       | 727.68054       | 738.6444                              | 04:34                |                         |
| 0.908825543       | 708.07001       | 732.2299                              | 04:36                |                         |
| 0.900181753       | 701.33453       | 727.8881                              | 04:38                |                         |
| 0.873482280       | 680.53186       | 723.8119                              | 04:40                |                         |
| 0.833188456       | 649.13788       | 719.2430                              | 04:42                |                         |

|             |           |          |       |
|-------------|-----------|----------|-------|
| 0.808019499 | 629.52777 | 715.1793 | 04:44 |
| 0.800200746 | 623.43524 | 712.5164 | 04:46 |
| 0.749530069 | 583.95691 | 708.3204 | 04:48 |

ASAP 2010 V5.02 H      Unit 1      Serial # 2804      Page 2

Sample: MANEE ME50 SAMPLE2  
 Operator:  
 Submitter:  
 File Name: C:\ASAP2010\DATA\000-330.SMP

Started: 12/3/13 1:19:11PM    Analysis Adsorptive: N2  
 Completed: 12/3/13 7:52:54PM    Analysis Bath: 77.35 K  
 Report Time: 12/4/13 12:22:19PM    Thermal Correction: No  
 Sample Weight: 0.0390 g    Smoothed Pressures: No  
 Warm Freespace: 26.9656 cm<sup>3</sup>    Cold Freespace: 84.3376 cm<sup>3</sup>  
 MEASURED  
 Equil. Interval: 5 secs    Low Pressure Dose: None

---

#### Analysis Log

| Relative Pressure | Pressure (mmHg) | Vol Adsorbed (cm <sup>3</sup> /g STP) | Elapsed Time (HR:MN) | Saturation Press.(mmHg) |
|-------------------|-----------------|---------------------------------------|----------------------|-------------------------|
| 0.684348610       | 533.17340       | 699.3829                              | 04:50                |                         |
| 0.650046449       | 506.44757       | 691.4480                              | 04:53                |                         |
| 0.601153043       | 468.35358       | 675.0970                              | 04:57                |                         |
| 0.551558156       | 429.71265       | 648.3128                              | 05:03                |                         |
| 0.502536613       | 391.51727       | 602.3699                              | 05:14                |                         |
|                   |                 | 05:17                                 | 779.08032            |                         |
| 0.454570278       | 354.14676       | 519.6702                              | 05:36                |                         |
| 0.395617219       | 308.21759       | 439.0060                              | 05:52                |                         |
| 0.346726205       | 270.12756       | 408.6908                              | 06:00                |                         |
| 0.290958358       | 226.67993       | 377.5899                              | 06:08                |                         |
| 0.251024936       | 195.56859       | 355.5200                              | 06:15                |                         |
| 0.200444974       | 156.16273       | 326.8814                              | 06:24                |                         |
| 0.140533178       | 109.48663       | 290.9993                              | 06:34                |                         |

Sample: MANEE ME50 SAMPLE2

Operator:

Submitter:

File Name: C:\ASAP2010\DATA\000-330.SMP

Started: 12/3/13 1:19:11PM Analysis Adsorptive: N2

Completed: 12/3/13 7:52:54PM Analysis Bath: 77.35 K

Report Time: 12/4/13 12:22:19PM Thermal Correction: No

Sample Weight: 0.0390 g Smoothed Pressures: No

Warm Freespace: 26.9656 cm<sup>3</sup> Cold Freespace: 84.3376 cm<sup>3</sup>

MEASURED

Equil. Interval: 5 secs

Low Pressure Dose: None

## BET Surface Area Report

BET Surface Area: 1187.7596 ± 6.7348 m<sup>2</sup>/g

Slope: 0.003604 ± 0.000021

Y-Intercept: 0.000061 ± 0.000003

C: 59.780467

VM: 272.847535 cm<sup>3</sup>/g STP

Correlation Coefficient: 9.999021e-01

Molecular Cross-section: 0.1620 nm<sup>2</sup>

| Relative<br>Pressure | Vol<br>Adsorbed<br>(cm <sup>3</sup> /g STP) | 1/<br>[VA*(Po/P - 1)] |
|----------------------|---------------------------------------------|-----------------------|
| 0.059476162          | 232.8964                                    | 0.000272              |
| 0.077457418          | 246.6897                                    | 0.000340              |
| 0.099711744          | 261.8477                                    | 0.000423              |
| 0.119702483          | 274.4307                                    | 0.000495              |
| 0.139577189          | 286.4065                                    | 0.000566              |
| 0.159561731          | 297.9986                                    | 0.000637              |
| 0.179540750          | 309.4835                                    | 0.000707              |
| 0.199643700          | 320.5264                                    | 0.000778              |

Sample: MANEE ME50 SAMPLE2

Operator:

Submitter:

File Name: C:\ASAP2010\DATA\000-330.SMP

Started: 12/3/13 1:19:11PM Analysis Adsorptive: N2

Completed: 12/3/13 7:52:54PM Analysis Bath: 77.35 K

Report Time: 12/4/13 12:22:19PM Thermal Correction: No

Sample Weight: 0.0390 g Smoothed Pressures: No

Warm Freespace: 26.9656 cm<sup>3</sup> Cold Freespace: 84.3376 cm<sup>3</sup>

MEASURED

Equil. Interval: 5 secs

Low Pressure Dose: None

---

t-Plot Report

Micropore Volume: -0.075912 cm<sup>3</sup>/g  
Micropore Area: -120.7243 m<sup>2</sup>/g  
External Surface Area: 1308.4839 m<sup>2</sup>/g  
Slope: 84.592958 ± 0.248473  
Y-Intercept: -49.076590 ± 1.026914  
Correlation Coefficient: 9.99978e-01  
Thickness Range: 3.5000 to 5.0000 Å

$$t = [13.9900 / (0.0340 - \log(P/P_0))] 0.5000$$

Surface Area Correction Factor: 1.00

Density Conversion Factor: 0.001547

Total Surface Area (by BET): 1187.7596

| Relative Pressure | Statistical Thickness (Å) | Vol Adsorbed (cm <sup>3</sup> /g) |
|-------------------|---------------------------|-----------------------------------|
| 0.009696153       | 2.6140                    | 165.5964                          |
| 0.029195433       | 2.9864                    | 202.6007                          |
| 0.059476162       | 3.3326                    | 232.8964                          |
| 0.077457418       | 3.4956                    | 246.6897                          |
| 0.099711744       | 3.6761                    | 261.8477                          |
| 0.119702483       | 3.8256                    | 274.4307                          |
| 0.139577189       | 3.9665                    | 286.4065                          |
| 0.159561731       | 4.1029                    | 297.9986                          |
| 0.179540750       | 4.2355                    | 309.4835                          |
| 0.199643700       | 4.3665                    | 320.5264                          |
| 0.247472692       | 4.6737                    | 346.0134                          |
| 0.300827520       | 5.0176                    | 373.3956                          |
| 0.352159091       | 5.3583                    | 399.4691                          |
| 0.399662336       | 5.6887                    | 424.2953                          |
| 0.449577198       | 6.0581                    | 452.3903                          |
| 0.499741916       | 6.4598                    | 483.0664                          |
| 0.549579949       | 6.8986                    | 517.9254                          |
| 0.600044963       | 7.3951                    | 557.8402                          |
| 0.650307459       | 7.9585                    | 601.3031                          |

Sample: MANEE ME50 SAMPLE2  
Operator:  
Submitter:  
File Name: C:\ASAP2010\DATA\000-330.SMP

Started: 12/3/13 1:19:11PM Analysis Adsorptive: N2  
Completed: 12/3/13 7:52:54PM Analysis Bath: 77.35 K  
Report Time: 12/4/13 12:22:19PM Thermal Correction: No  
Sample Weight: 0.0390 g Smoothed Pressures: No  
Warm Freespace: 26.9656 cm<sup>3</sup> Cold Freespace: 84.3376 cm<sup>3</sup>  
MEASURED  
Equil. Interval: 5 secs Low Pressure Dose: None

---

### Summary Report

#### Area

|                                                                                                  |                             |
|--------------------------------------------------------------------------------------------------|-----------------------------|
| Single Point Surface Area at P/Po 0.19964370 :                                                   | 1116.7492 m <sup>2</sup> /g |
| BET Surface Area:                                                                                | 1187.7596 m <sup>2</sup> /g |
| Langmuir Surface Area:                                                                           | 1665.8753 m <sup>2</sup> /g |
| Micropore Area:                                                                                  | -120.7243 m <sup>2</sup> /g |
| External Surface Area:                                                                           | 1308.4839 m <sup>2</sup> /g |
| BJH Adsorption Cumulative Surface Area of pores<br>between 17.000000 and 3000.000000 A Diameter: | 1250.4231 m <sup>2</sup> /g |
| BJH Desorption Cumulative Surface Area of pores<br>between 17.000000 and 3000.000000 A Diameter: | 1426.0217 m <sup>2</sup> /g |

#### Volume

|                                                                                                         |                              |
|---------------------------------------------------------------------------------------------------------|------------------------------|
| Single Point Adsorption Total Pore Volume of pores less than<br>824.3239 A Diameter at P/Po 0.97594041: | 1.130270 cm <sup>3</sup> /g  |
| Micropore Volume:                                                                                       | -0.075912 cm <sup>3</sup> /g |
| BJH Adsorption Cumulative Pore Volume of pores<br>between 17.000000 and 3000.000000 A Diameter:         | 1.250046 cm <sup>3</sup> /g  |
| BJH Desorption Cumulative Pore Volume of pores<br>between 17.000000 and 3000.000000 A Diameter:         | 1.250506 cm <sup>3</sup> /g  |

#### Pore Size

|                                                 |           |
|-------------------------------------------------|-----------|
| Adsorption Average Pore Diameter (4V/A by BET): | 38.0639 A |
| BJH Adsorption Average Pore Diameter (4V/A):    | 39.9879 A |
| BJH Desorption Average Pore Diameter (4V/A):    | 35.0768 A |

## References

1. Sen, T.; Magdassi, S.; Nizri, G.; Bruce, I. J., Dispersion of magnetic nanoparticles in suspension. *Micro. Nano. Let.* **2006**, *1* (1), 39.
2. Sen, T.; Ian, J. B., Surface engineering of nanoparticles in suspension for particle based bio-sensing. *Sci. Rep-UK.* **2012**, *2*, 564 | DOI: 10.1038/srep00564
3. Moon, J. H.; Kim, J. H.; Kim, K.; Kang, T. H.; Kim, B.; Kim, C. H.; Hahn, J. H.; Park, J. W. *Langmuir* **1997**, *13*, 4305.
4. Sen, T.; Bruce, I. J.; *Langmuir* **2005**, *21*, 7029.
5. Bradford, M.; *Anal. Biochem.* **1976**, *72*, 248.
6. Sun, Y. K.; Ma, M.; Zhang, Y.; Gu, N., Synthesis of nanometer-size maghemite particles from magnetite. *Colloid. Surface. A.* **2004**, *245* (1–3), 15.
7. Parker, D.; Taylor, R. J.; Analytical methods: Determination of enatiomeric purity, in *Asymmetric synthesis*, 1<sup>st</sup> ed., Aitken, R. A. and Nilenyi, S. N. Eds., London, Chapman & Hall, **1992**, 33.
8. B. Hodgson, Peer-reviewed PhD Thesis, University of Central Lancashire, Preston, UK, February, 2014.
